# Supplementary material for: Insight into the High-Efficiency Benzo(a)pyrene Degradation Ability of Pseudomonas benzopyrenica BaP3 and Its Application in the Complete Bioremediation of Benzo(a)pyrene
Source: MDPI journal article supplement (doi:10.3390/ijms242015323), 2023-10-18
Supplement: s1 [file s1]

## Supplementary Materials

# Insight into the High-Efficiency Benzo(a)pyrene Degradation Ability of *Pseudomonas benzopyrenica* BaP3 and Its Application in the Complete Bioremediation of Benzo(a)pyrene

Xingchen Dong, Siyi Wu, Zihuan Rao, Yaqian Xiao, Yan Long and Zhixiong Xie \*

Hubei Key Laboratory of Cell Homeostasis, College of Life Sciences, Wuhan University, Wuhan 430072, China; andy97@whu.edu.cn (X.D.); 2020202040040@whu.edu.cn (S.W.); rzhmio@whu.edu.cn (Z.R.); 2018102040012@whu.edu.cn (Y.X.); skyjck4@whu.edu.cn (Y.L.)

\* Correspondence: [zxjie@whu.edu.cn](mailto:zxjie@whu.edu.cn)

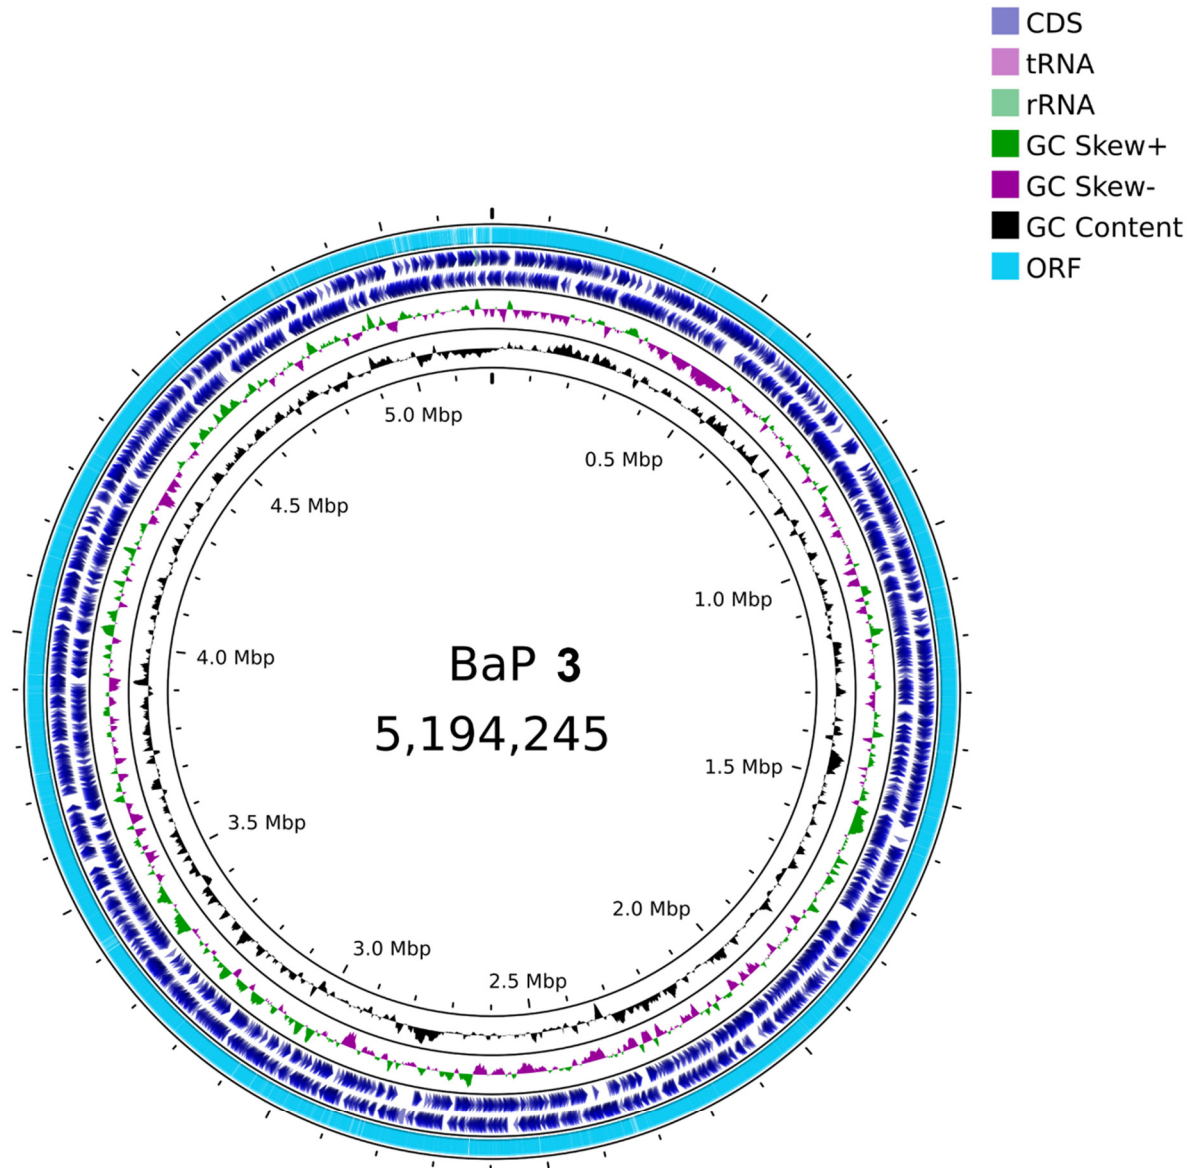

**Figure S1.** The whole genomic map of strain BaP3. The full length of the genome was 5.19 Mbp with the accession number JAPFGF000000000.

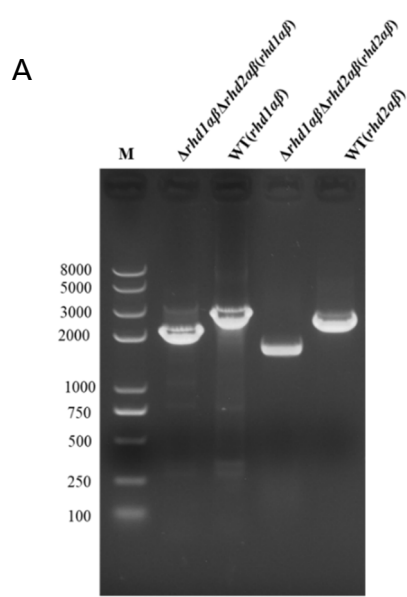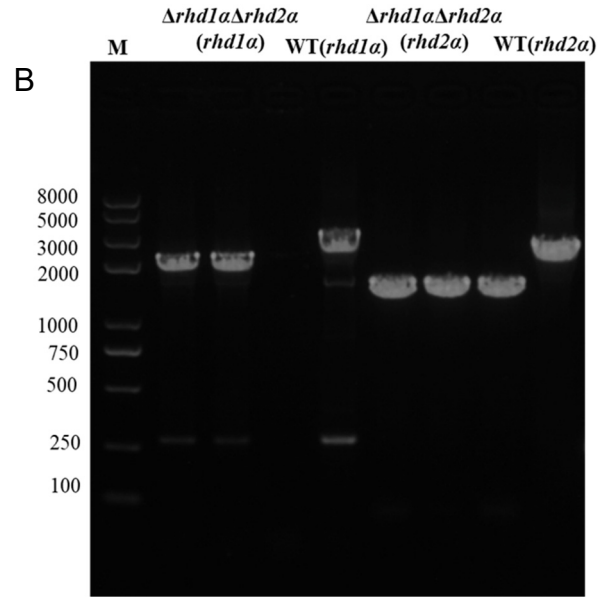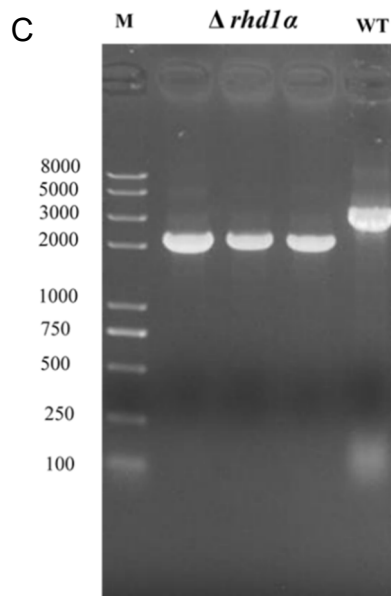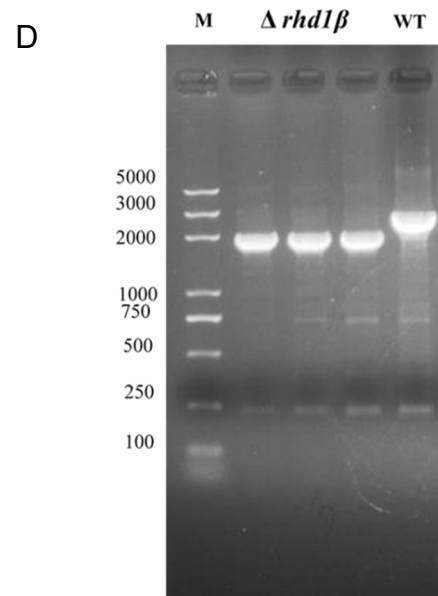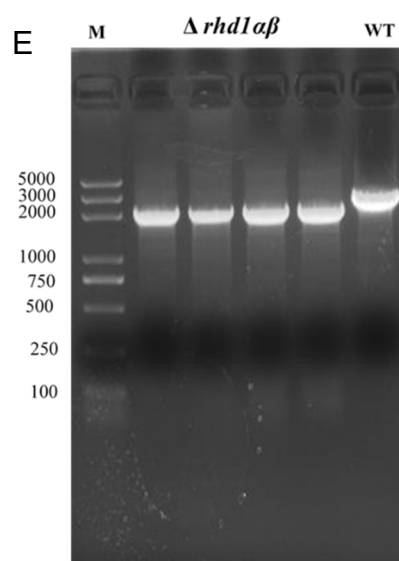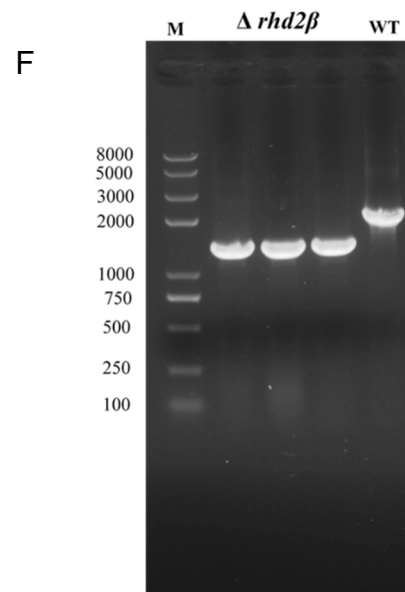

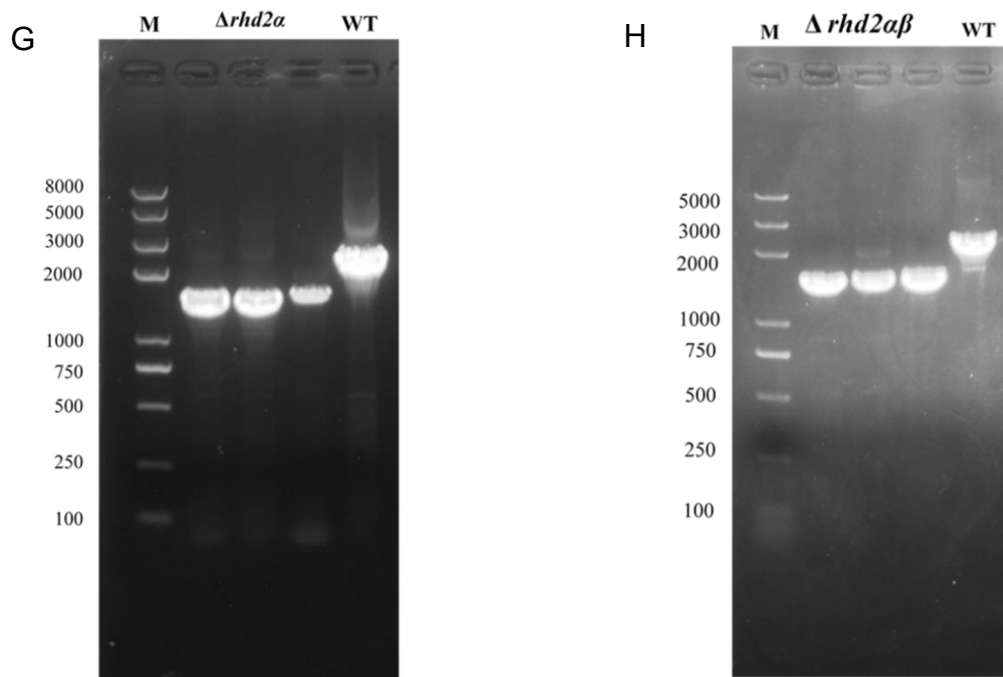

**Figure S2.** The identifications of knock-out mutant strains. The fragments of mutants were shorter than wild type BaP3. The strain  $\Delta rhd1\alpha\beta\Delta rhd2\alpha\beta$  (A),  $\Delta rhd1\alpha\Delta rhd2\alpha$  (B),  $\Delta rhd1\alpha$  (C),  $\Delta rhd1\beta$  (D),  $\Delta rhd1\alpha\beta$  (E),  $\Delta rhd2\alpha$  (F),  $\Delta rhd2\beta$  (G), and  $\Delta rhd2\alpha\beta$  (H) were obtained.

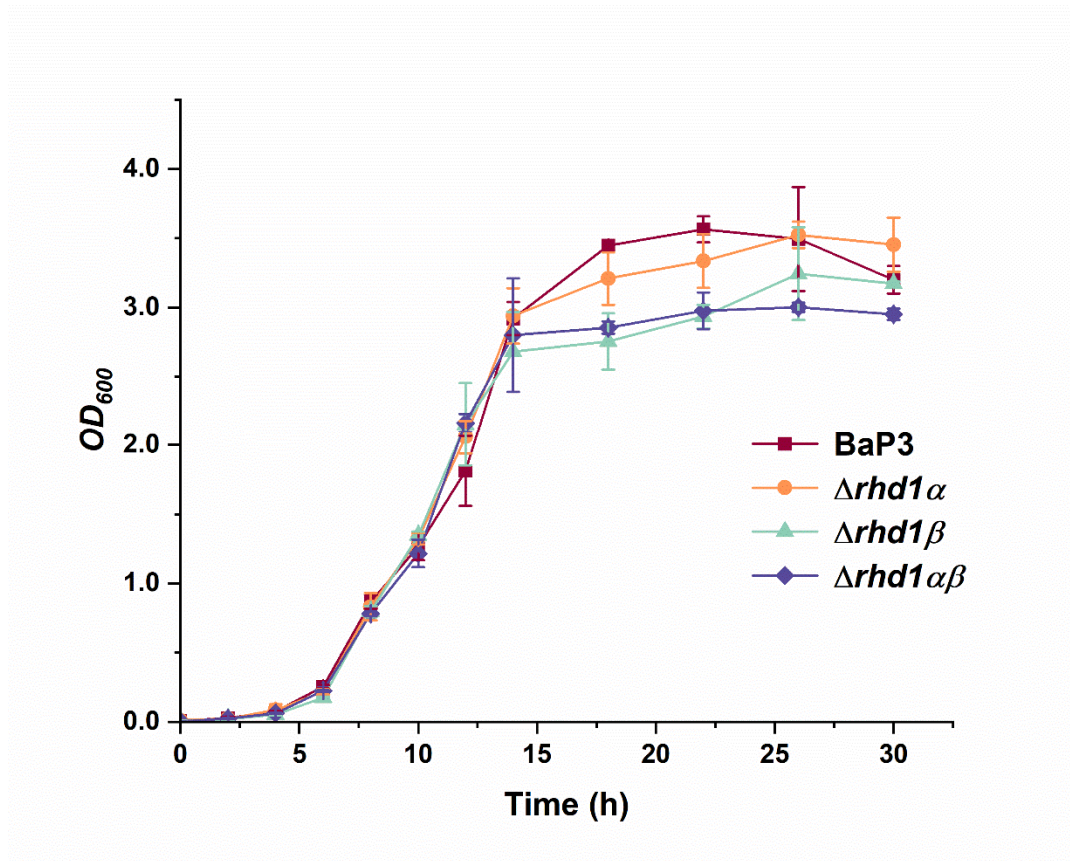

**Figure S3.** The growth curves in LB medium. The growth curves were obtained in 50 mL LB medium, samples were taken every 2 h and measured the absorbance at 600 nm. The gene deletion strains and wild type showed a similar growth rate in LB medium. The values proposed were the average  $\pm$  standard deviation of a least three times of independent experiments.

|                                             |                                          |     |
|---------------------------------------------|------------------------------------------|-----|
| 3gl2. 1. A                                  | .FVRNAWYVAALFEELSEKPLGRITILDTPALYRQPDGVV | 39  |
| <i>Pseudomonas benzopyrenica</i> BaP3 Rhd1α | MYPKNAWYVACTFEVQDKPLGRQICGEPVIFYRDANGQV  | 40  |
|                                             | nawyva p e kplgr i pl yr g v             |     |
| 3gl2. 1. A                                  | AAILDTCPHRFAPLSDGILVNGHLCQPYHGLEFDGGQCV  | 79  |
| <i>Pseudomonas benzopyrenica</i> BaP3 Rhd1α | VALEDFCPHRGAPLSLGFVRDGTIVCGYHGLEMGGGKTL  | 80  |
|                                             | al d cphr apls g g l c yhggle gg         |     |
| 3gl2. 1. A                                  | HNPHGNGARPASLNVRSEFVVERDAIWIWPGDFALADFG  | 119 |
| <i>Pseudomonas benzopyrenica</i> BaP3 Rhd1α | GMFGQRVG..VFPAVRPYAAVERHGEIWWPGDQAKADPA  | 118 |
|                                             | p vr ver iw wpgd a adp                   |     |
| 3gl2. 1. A                                  | AIPDFGCRVDPAYRTVGGYCHVDONKLLVDNLMDLIGHAQ | 159 |
| <i>Pseudomonas benzopyrenica</i> BaP3 Rhd1α | LIFYLEWAESEPDWAYGGGLYHIQCDYRIMIDNLMDITHT | 158 |
|                                             | ip p gg h c y l dnlnmdl h                |     |
| 3gl2. 1. A                                  | YVHRANAQTDAFIRLEREVIVGDGEIQALMKIPGGTPSVL | 199 |
| <i>Pseudomonas benzopyrenica</i> BaP3 Rhd1α | YVHASSIGQKEIDEAPPATRVEGDEVITSRHMENISAPPF | 198 |
|                                             | yvh d v e                                |     |
| 3gl2. 1. A                                  | MAKFLRG...ANTPVDANNDIRWNKVSAMLNFIIVAPEG  | 235 |
| <i>Pseudomonas benzopyrenica</i> BaP3 Rhd1α | WRMALRGNGLADDPVDRWQICRFTPPSHVMIEVGVAHAG  | 238 |
|                                             | lrg pvd w r s va g                       |     |
| 3gl2. 1. A                                  | T....EKEQSIHSRGTHILTPETEASCHYFFGSSRNFGI  | 270 |
| <i>Pseudomonas benzopyrenica</i> BaP3 Rhd1α | HGGYDAFATVKAASVVVDFITPETETSIWYFWGMARNFKA | 278 |
|                                             | p s tpete s yf g rnf                     |     |
| 3gl2. 1. A                                  | DDPEMDGVLRSWCAQALVKEDKVVVEAERRRAYVEANGI  | 310 |
| <i>Pseudomonas benzopyrenica</i> BaP3 Rhd1α | EDAELTASIRECGKIFGEDLEMLERQQNLLRYPERGLL   | 318 |
|                                             | d e r q y e                              |     |
| 3gl2. 1. A                                  | RPAMLSCEAAVRVSREIEKLEQLEA.....           | 337 |
| <i>Pseudomonas benzopyrenica</i> BaP3 Rhd1α | KLNIDAGGVQSRQIIDRLLAEEQAATGIPVRQI        | 351 |
|                                             | eq                                       |     |

**Figure S4.** The multiple alignment of 3gl2. 1. A and Rhd1α, they shared 37.46% similarity. To form a hydrophobic substrate binding cavity, some residues was changed from hydrophilic amino acid to hydrophobic amino acid (Arg163 to Ala162, Glu177 to Ala176, Pro273 to Ala281, and Gly277 to Ala285) or become more hydrophobic (Ala166 to Ile165).



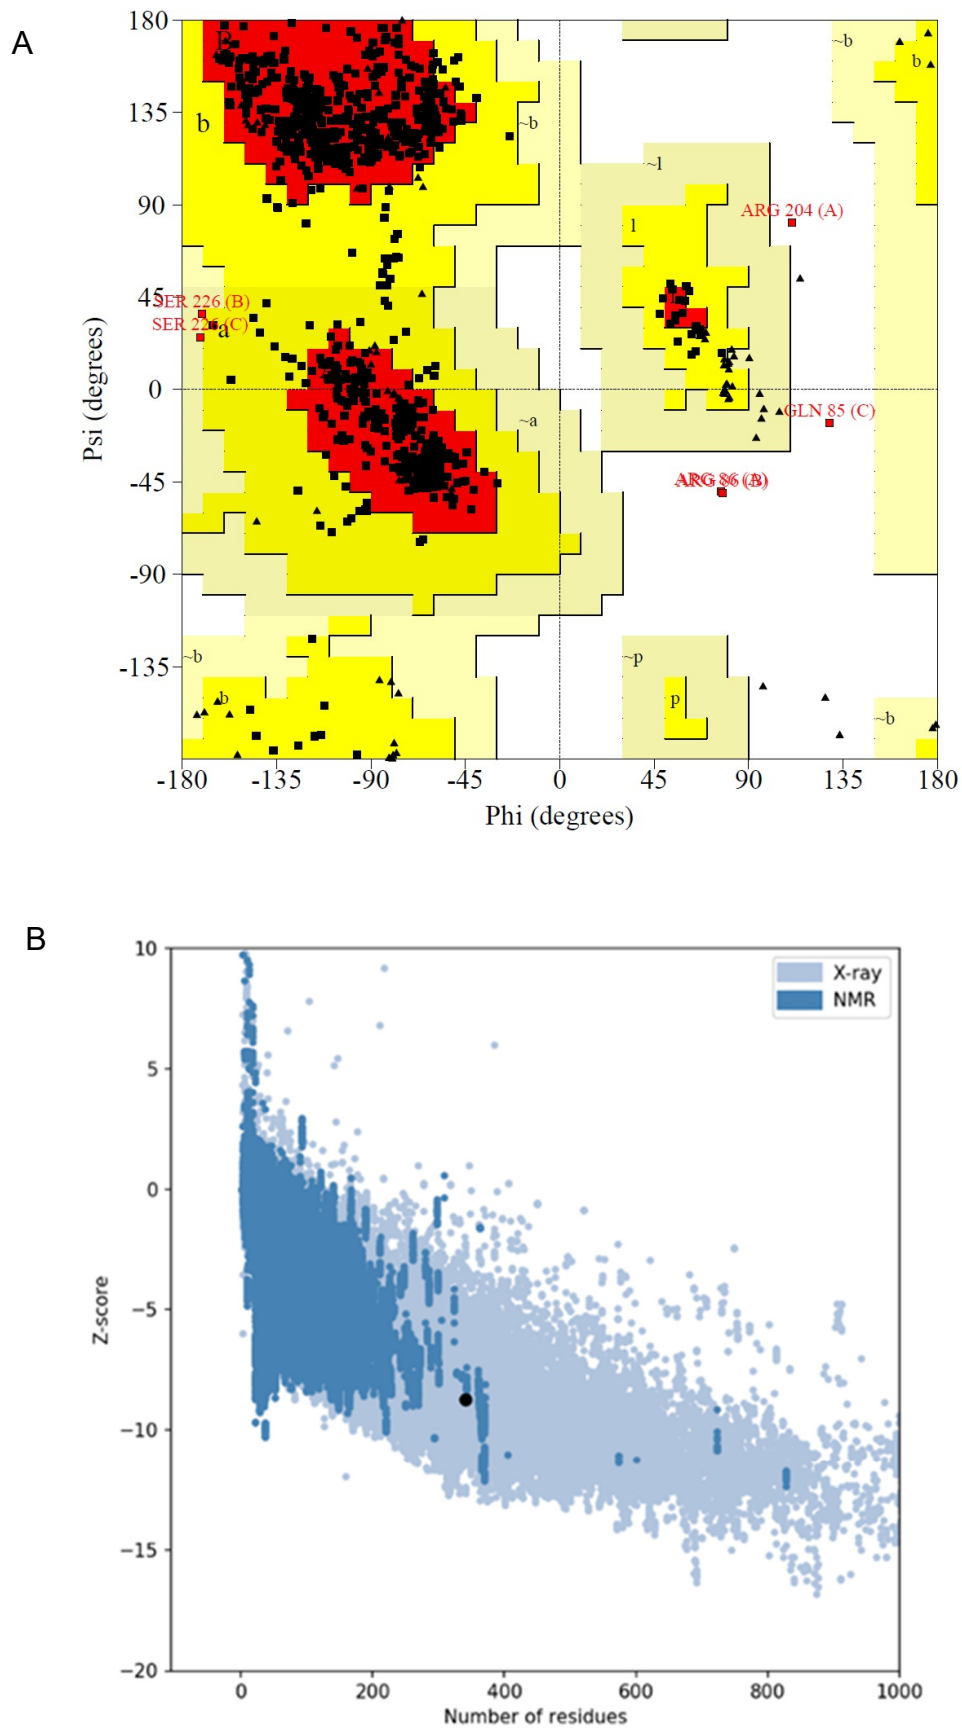

**Figure S5.** The Ramachandran plot of Rhd1 $\alpha$  (A) and Z-Score analysis (B). According to the Ramachandran plot, 99.3% of residues were located in most favored or allowed regions. The Z-Score was -8.74. It identified that the model of Rhd1 $\alpha$  was reasonable and stable.

A

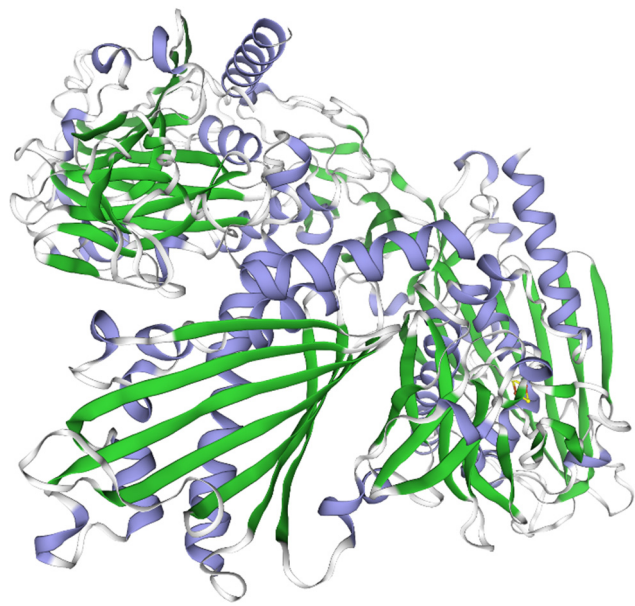

B

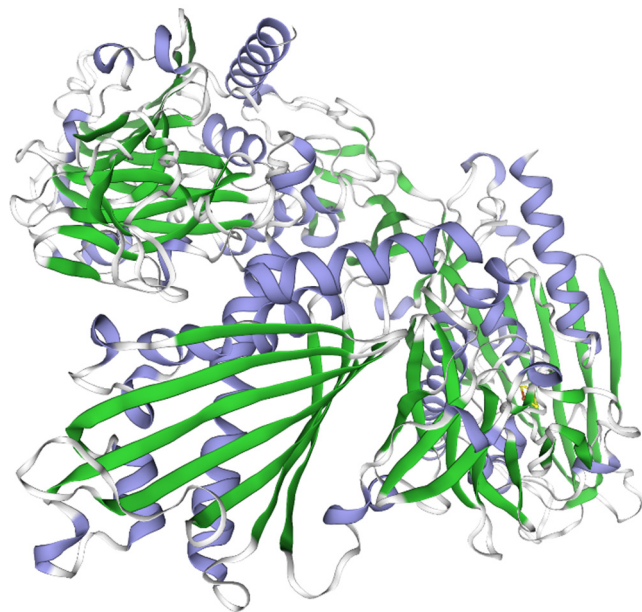



C

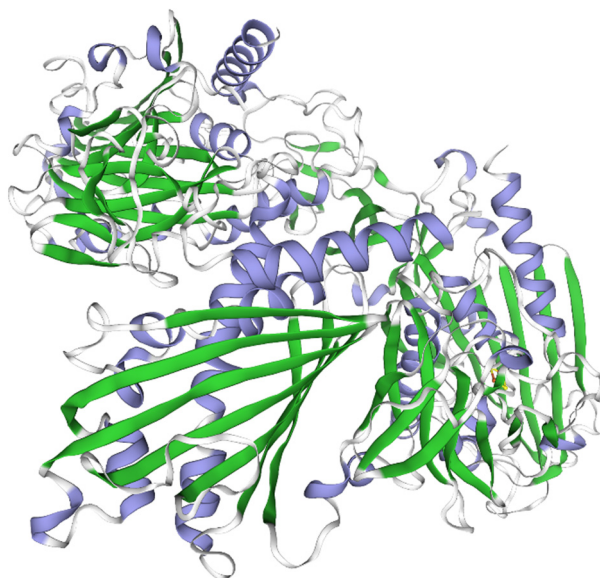

D

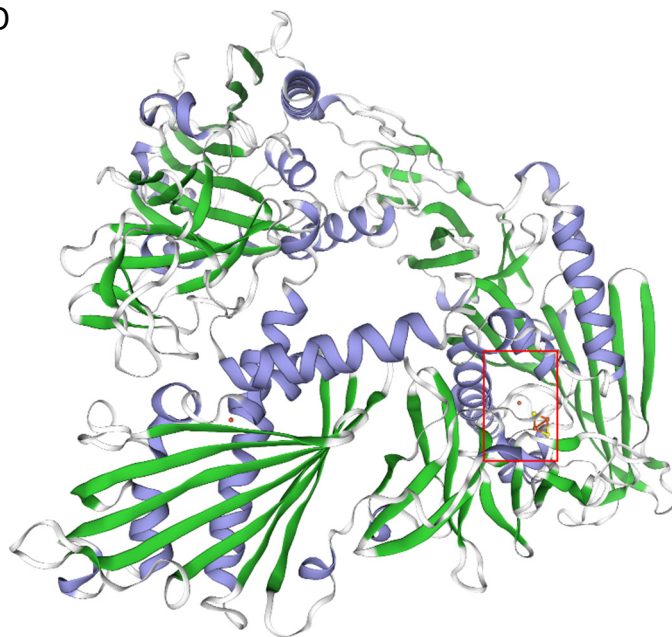

**Figure S6.** The structures of point-mutated strains (A–D). The active site could not be formed due to the point substitution of H156, H161, and D298 to Ala, while the substitution of Y159 to Ala could still construct the active site. The point mutations of H156, H161, and D298 to Ala caused the active site could not to be formed, while the mutation of Y159 to Ala could still construct the active site (yellow atoms in a red box at the bottom right-hand corner of the Figure S6D).

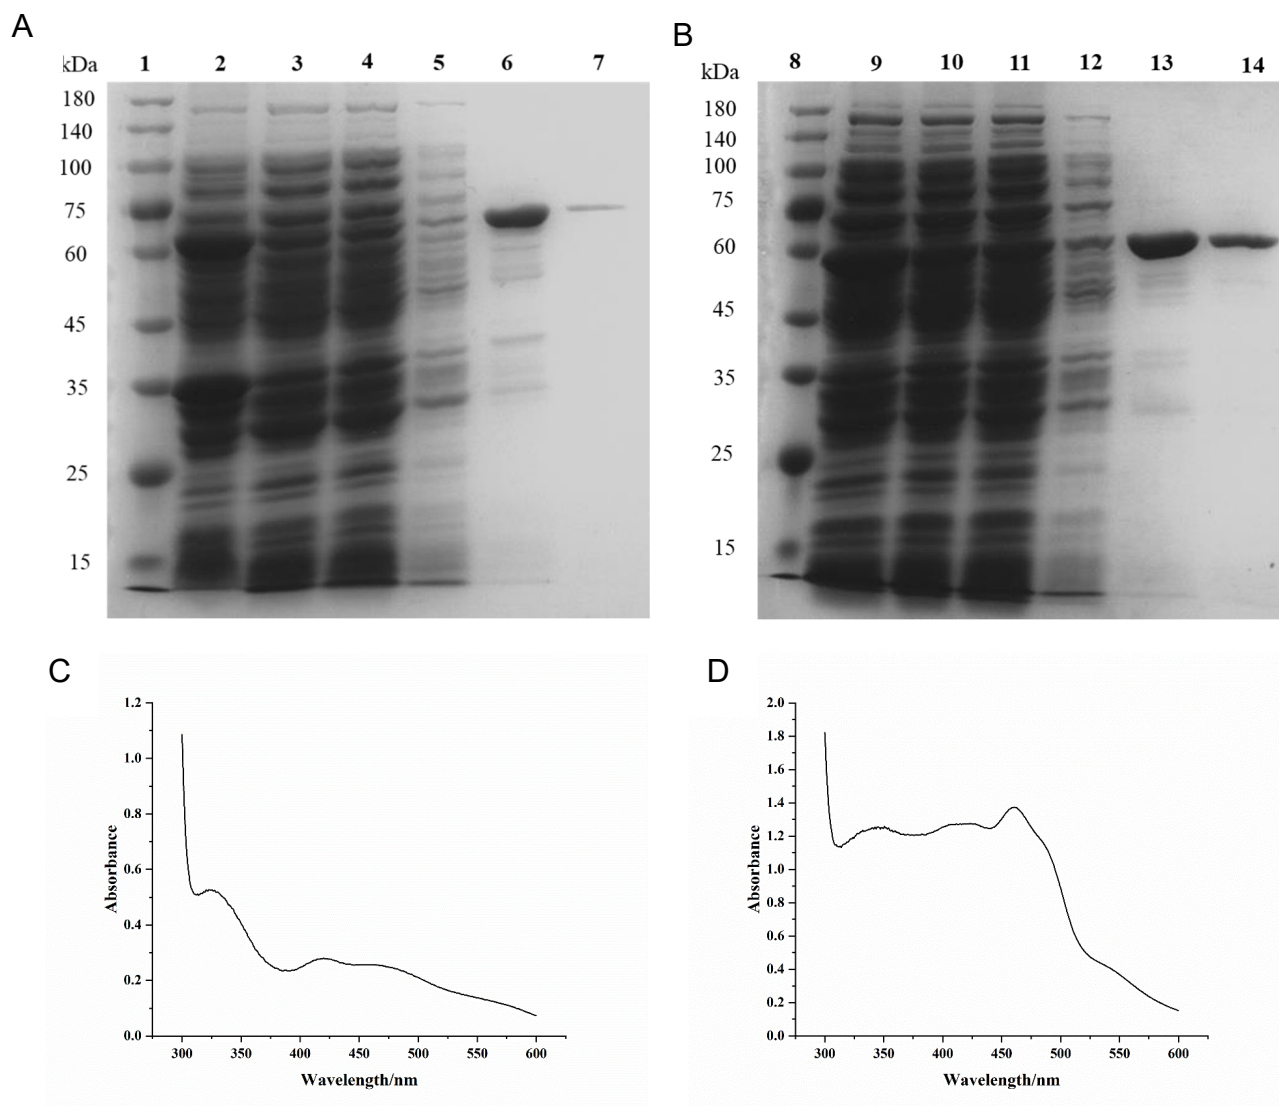

**Figure S7.** The SDS-PAGE of purified protein Rhd1α (A) and Rhd1β (B). The ultraviolet scanning of purified Rhd1α (C), and Rhd1β (D). The SDS-PAGE showed the purification process of Rhd1α and Rhd1β. Lane 1 and 8 were the protein marker (molecular weight was shown on the left). Lane 2 and 9 were the supernatant after ultrasonic. Lane 3,4 and 10,11 were the flow through liquid after passing the column. Lane 5 and 12 were to wash the impurity proteins by Tris/NaCl buffer. Lane 6,7 and 13,14 were the eluted target proteins liquid. The purified Rhd1α protein had absorption peaks at 323 nm, 420 nm, and 454nm. For Rhd1β, it had absorption peaks at 345 nm, 423 nm, 460 nm, 485 nm (shoulder), and 548 nm (shoulder).

**Table S1.** Bacterial strains used in this study.

| Strains                                        | Description <sup>a</sup>                                                                                                                                                                                                                                          | Source            |
|------------------------------------------------|-------------------------------------------------------------------------------------------------------------------------------------------------------------------------------------------------------------------------------------------------------------------|-------------------|
| <i>Escherichia coli</i> S17-1 ( $\lambda$ pir) | <i>thi</i> , <i>pro</i> , <i>hsdR</i> , <i>recA</i> ; chromosomal RP4-2; (Tc::Mu) (Km::Tn7) T <sup>r</sup> , Sp <sup>r</sup>                                                                                                                                      | Simon, et al. [1] |
| <i>E. coli</i> DH5 $\alpha$                    | F, $\phi$ 80( <i>lacZ</i> ) $\Delta$ M15, $\Delta$ ( <i>lacZYA-argF</i> ) U169, <i>deoR</i> , <i>recA1</i> , <i>endA1</i> , <i>hsdR17</i> (rK <sup>+</sup> , mK <sup>+</sup> ), <i>phoA</i> , <i>supE44</i> $\lambda$ , <i>thi-1</i> <i>gyrA96</i> , <i>relA1</i> | Laboratory        |
| <i>E. coli</i> BL21 (DE3)                      | F, <i>ompT</i> , <i>hsdS</i> (r <sup>+</sup> m <sup>+</sup> ), <i>gal</i> , <i>dcm</i> (DE3)                                                                                                                                                                      | Laboratory        |
| <i>Pseudomonas benzopyrenica</i> BaP3          | Wild-type, Cm <sup>r</sup>                                                                                                                                                                                                                                        | Laboratory        |
| <i>P. donghuensis</i> HYS                      | Wild-type, Cm <sup>r</sup>                                                                                                                                                                                                                                        | Laboratory        |
| BL21-1                                         | BL21/pGEX-rhd1 $\alpha$                                                                                                                                                                                                                                           | This study        |
| BL21-2                                         | BL21/pGEX-rhd1 $\beta$                                                                                                                                                                                                                                            | This study        |
| BaP3-1                                         | $\Delta$ rhd1 $\alpha$ $\Delta$ rhd2 $\alpha$                                                                                                                                                                                                                     | This study        |
| BaP3-2                                         | $\Delta$ rhd1 $\alpha$ $\Delta$ rhd2 $\alpha$ /pBBR2                                                                                                                                                                                                              | This study        |
| BaP3-3                                         | $\Delta$ rhd1 $\alpha$ $\Delta$ rhd2 $\alpha$ /pBBR2-rhd1 $\alpha$                                                                                                                                                                                                | This study        |
| BaP3-4                                         | $\Delta$ rhd1 $\alpha$ $\Delta$ rhd2 $\alpha$ /pBBR2-rhd2 $\alpha$                                                                                                                                                                                                | This study        |
| BaP3-5                                         | $\Delta$ rhd1 $\alpha$ $\beta$ $\Delta$ rhd2 $\alpha$ $\beta$                                                                                                                                                                                                     | This study        |
| BaP3-6                                         | $\Delta$ rhd1 $\alpha$ $\beta$ $\Delta$ rhd2 $\alpha$ $\beta$ /pBBR2                                                                                                                                                                                              | This study        |
| BaP3-7                                         | $\Delta$ rhd1 $\alpha$ $\beta$ $\Delta$ rhd2 $\alpha$ $\beta$ /pBBR2-rhd1                                                                                                                                                                                         | This study        |
| BaP3-8                                         | $\Delta$ rhd1 $\alpha$ $\beta$ $\Delta$ rhd2 $\alpha$ $\beta$ /pBBR2-rhd2                                                                                                                                                                                         | This study        |
| BaP3-9                                         | $\Delta$ rhd1 $\alpha$                                                                                                                                                                                                                                            | This study        |
| BaP3-10                                        | $\Delta$ rhd1 $\alpha$ /pBBR2-rhd1 $\alpha$                                                                                                                                                                                                                       | This study        |
| BaP3-11                                        | $\Delta$ rhd1 $\alpha$ /pBBR2                                                                                                                                                                                                                                     | This study        |
| BaP3-12                                        | $\Delta$ rhd1 $\alpha$ /pBBR2-H156A                                                                                                                                                                                                                               | This study        |
| BaP3-13                                        | $\Delta$ rhd1 $\alpha$ /pBBR2-H161A                                                                                                                                                                                                                               | This study        |
| BaP3-14                                        | $\Delta$ rhd1 $\alpha$ /pBBR2-D298A                                                                                                                                                                                                                               | This study        |
| BaP3-15                                        | $\Delta$ rhd1 $\alpha$ /pBBR2-Y159A                                                                                                                                                                                                                               | This study        |
| BaP3-16                                        | $\Delta$ rhd1 $\beta$                                                                                                                                                                                                                                             | This study        |
| BaP3-17                                        | $\Delta$ rhd1 $\beta$ /pBBR2-rhd1 $\beta$                                                                                                                                                                                                                         | This study        |
| BaP3-18                                        | $\Delta$ rhd1 $\alpha$ $\beta$                                                                                                                                                                                                                                    | This study        |
| BaP3-19                                        | $\Delta$ rhd1 $\alpha$ $\beta$ /pBBR2-rhd1 $\alpha$ $\beta$                                                                                                                                                                                                       | This study        |
| BaP3-20                                        | $\Delta$ rhd2 $\alpha$                                                                                                                                                                                                                                            | This study        |
| BaP3-21                                        | $\Delta$ rhd2 $\alpha$ /pBBR2-rhd2 $\alpha$                                                                                                                                                                                                                       | This study        |
| BaP3-22                                        | $\Delta$ rhd2 $\beta$                                                                                                                                                                                                                                             | This study        |
| BaP3-23                                        | $\Delta$ rhd2 $\beta$ /pBBR2-rhd2 $\beta$                                                                                                                                                                                                                         | This study        |
| BaP3-24                                        | $\Delta$ rhd2 $\alpha$ $\beta$                                                                                                                                                                                                                                    | This study        |
| BaP3-25                                        | $\Delta$ rhd2 $\alpha$ $\beta$ /pBBR2-rhd2 $\alpha$ $\beta$                                                                                                                                                                                                       | This study        |
| HYS-1                                          | HYS/pBBR2-rhd1 $\alpha$ $\beta$                                                                                                                                                                                                                                   | This study        |
| HYS-2                                          | HYS/pBBR2                                                                                                                                                                                                                                                         | This study        |

<sup>a</sup> Cm, chloramphenicol, Gm, gentamicin, Km, kanamycin;.

**Table S2.** Plasmids used in this study

| Plasmids                 | Description <sup>a</sup>                                                                       | Source                        |
|--------------------------|------------------------------------------------------------------------------------------------|-------------------------------|
| pEX18Gm                  | Gene replacement vector, Gm <sup>r</sup> , <i>oriT</i> <sup>+</sup> , <i>sacB</i> <sup>+</sup> | Hoang, et al. [2]             |
| pEX18-rhd1 $\alpha$      | Gene replacement vector for <i>rhd1<math>\alpha</math></i>                                     | This study                    |
| pEX18-rhd1 $\beta$       | Gene replacement vector for <i>rhd1<math>\beta</math></i>                                      | This study                    |
| pEX18-rhd1 $\alpha\beta$ | Gene replacement vector for <i>rhd1<math>\alpha\beta</math></i>                                | This study                    |
| pEX18-rhd2 $\alpha$      | Gene replacement vector for <i>rhd2<math>\alpha</math></i>                                     | This study                    |
| pEX18-rhd2 $\beta$       | Gene replacement vector for <i>rhd2<math>\beta</math></i>                                      | This study                    |
| pEX18-rhd2 $\alpha\beta$ | Gene replacement vector for <i>rhd2<math>\alpha\beta</math></i>                                | This study                    |
| pBBR1-MCS2               | Mobilizable broad-host-range cloning vector, Km <sup>r</sup>                                   | Kovach et al. [3]             |
| pBBR2-rhd1 $\alpha$      | Cloning vector for <i>rhd1<math>\alpha</math></i>                                              | This study                    |
| pBBR2-rhd1 $\beta$       | Cloning vector for <i>rhd1<math>\beta</math></i>                                               | This study                    |
| pBBR2-rhd1 $\alpha\beta$ | Cloning vector for <i>rhd1<math>\alpha\beta</math></i>                                         | This study                    |
| pBBR2-rhd2 $\alpha$      | Cloning vector for <i>rhd2<math>\alpha</math></i>                                              | This study                    |
| pBBR2-rhd2 $\beta$       | Cloning vector for <i>rhd2<math>\beta</math></i>                                               | This study                    |
| pBBR2-rhd2 $\alpha\beta$ | Cloning vector for <i>rhd2<math>\alpha\beta</math></i>                                         | This study                    |
| pBBR2-H156A              | Point mutation vector of H156                                                                  | This study                    |
| pBBR2-H161A              | Point mutation vector of H161                                                                  | This study                    |
| pBBR2-D298A              | Point mutation vector of D298                                                                  | This study                    |
| pBBR2-Y159A              | Point mutation vector of Y159                                                                  | This study                    |
| pGEX-4T-1                | Protein expression vector, Am <sup>r</sup>                                                     | Gifted by Prof. Xiangdong Gao |
| pGEX-rhd1 $\alpha$       | Heterologous expression of <i>rhd1<math>\alpha</math></i>                                      | This study                    |
| pGEX-rhd1 $\beta$        | Heterologous expression of <i>rhd1<math>\beta</math></i>                                       | This study                    |

<sup>a</sup> Gm, gentamicin, Km, kanamycin, Am, ampicillin.

**Table S3.** Primers used in this research. The engineered restriction sites were underlined.

| Primer                   | Sequence (5'-3')                            | Purpose                                                                                                        |
|--------------------------|---------------------------------------------|----------------------------------------------------------------------------------------------------------------|
| rhd1 $\alpha$ -up-F      | CGGAATTCGGCCGTCGATCATGTTGAGCA               | Construction of<br>pEX18-rhd1 $\alpha$<br>pEX18-rhd1 $\beta$<br>pEX18-rhd1 $\alpha\beta$<br>and identification |
| rhd1 $\alpha$ -overlap-R | GATATTGAGCTTGAGCAGCCCGCGGACGAAGCCCAAGGA     |                                                                                                                |
| rhd1 $\alpha$ -overlap-F | TCCTTGGGCTTCGTCCGCGGGCTGCTCAAGCTCAATATC     |                                                                                                                |
| rhd1 $\alpha$ -down-R    | CCCAAGCTTGGGTGAGCCAGGGGATGAAGG              |                                                                                                                |
| rhd1 $\alpha$ -WF        | ACCAGCGGGATGGCCCCCAG                        |                                                                                                                |
| rhd1 $\alpha$ -WR        | GCGGCGTGCTCGGCTTCGGAAGAAA                   |                                                                                                                |
| rhd1 $\beta$ -up-F       | CGGAATTCGATGGCGCTACGTGGCAATGG               |                                                                                                                |
| rhd1 $\beta$ -overlap-R  | GGTCAGGCAGGTGCCGACACGGTGACAGCGAATAGTGG      |                                                                                                                |
| rhd1 $\beta$ -overlap-F  | CCACTATTCGCTCTGCACCGTCTGCGGCACCTGCCTGACC    |                                                                                                                |
| rhd1 $\beta$ -down-R     | CCCAAGCTTGGGGCGCCGAGGCGATCTGCTGTT           |                                                                                                                |
| rhd1 $\beta$ -WF         | GCAAGACCCTGGGCATGCCA                        |                                                                                                                |
| rhd1 $\beta$ -WR         | GCAAGCCGGGACAGCGGGTA                        |                                                                                                                |
| rhd1 $\alpha\beta$ -up-F | CGGAATTCGAAGGCCATTCGGGACCGGAT               | Construction of<br>pEX18-rhd2 $\alpha$<br>pEX18-rhd2 $\beta$<br>pEX18-rhd2 $\alpha\beta$<br>and identification |
| rhd1 $\alpha\beta$ -WF   | AGCATGCCGAGCCCCGAGAG                        |                                                                                                                |
| rhd2 $\alpha$ -up-F      | CCCAAGCTTGGGAGCCCGCTCATCGACTCGGA            |                                                                                                                |
| rhd2 $\alpha$ -overlap-R | GCGATGGGTGATGGCGACAAGCGCCCGGATGTTCTCGTCGTC  |                                                                                                                |
| rhd2 $\alpha$ -overlap-F | GACGACGAGAACATCCGGGGCGCTTGTCGCCATCACCCATCGC |                                                                                                                |
| rhd2 $\alpha$ -down-R    | CGGAATTCGGGGGGGTACGGGCACTGTGGAC             |                                                                                                                |
| rhd2 $\alpha$ -WF        | ACGAAGAGGTCTTTCCGGTC                        |                                                                                                                |
| rhd2 $\alpha$ -WR        | CCTCACAGATGGCGAAAACCTT                      |                                                                                                                |
| rhd2 $\beta$ -up-F       | GCTCTAGAGCGGTCATCGCCAATCATGGCGAATC          |                                                                                                                |
| rhd2 $\beta$ -overlap-R  | GCCACAGGAGGAAGGCACGATGGTGTAGCACCGCGAGAGACT  |                                                                                                                |
| rhd2 $\beta$ -overlap-F  | AGTCTCTCGCGGTGCTACACCATCGTGCCTTCTCTGTGGC    |                                                                                                                |
| rhd2 $\beta$ -down-R     | CGGAATTCGCGGCCAGCGTGACAGGATGAAATCG          |                                                                                                                |
| rhd2 $\beta$ -WF         | GGGAAGACCAAGGCCACCTCTGTGC                   | Construction of<br>pBBR2-rhd1 $\alpha$<br>pBBR2-rhd1 $\beta$<br>pBBR2-rhd1                                     |
| rhd2 $\beta$ -WR         | GCCCAGGGCACGTCGTCGTT                        |                                                                                                                |
| rhd2 $\alpha\beta$ -up-F | GCTCTAGAGCCCATGGCTCATGCCAGCGTA              |                                                                                                                |
| rhd2 $\alpha\beta$ -WF   | GCGACGCCTATTACCTGGTGACACCCCAT               |                                                                                                                |
| rhd1 $\alpha$ -F         | GGGGTACCCCATCGATTATTGGATCCAATAGACAA         |                                                                                                                |
| rhd1 $\alpha$ -R         | GCTCTAGAGCGAGCATGACTGTCTCTCTAGG             |                                                                                                                |
| rhd1 $\beta$ -F          | CCCTCGAGGGGCTAGGAGACAGTCATGCT               |                                                                                                                |
| rhd1 $\beta$ -R          | GCTCTAGAGCGGGCTCGGGTCATCAGAGGT              |                                                                                                                |
| rhd2 $\alpha$ -F         | GGGGTACCCCACTTCGATACTGCGGCC                 |                                                                                                                |
| rhd2 $\alpha$ -R         | GCTCTAGAGCTGAGGGTCGTCATGGTATTC              |                                                                                                                |
| rhd2 $\beta$ -F          | GGGGTACCCCGTGAGGAATACCATGACGACCC            |                                                                                                                |
| rhd2 $\beta$ -R          | GCTCTAGAGCTACCGATGCAGGCGCGTTG               |                                                                                                                |
| His156-F                 | ATGGATCTCACCGCCGAGACCTACGTCCAT              | Construction of<br>H156A                                                                                       |
| His156-R                 | ATGGACGTAGGTCTCGGCGGTGAGATCCAT              | Construction of<br>H161A                                                                                       |
| His161-F                 | CACGAGACCTACGTCGCTGCCTCCAGCATC              |                                                                                                                |
| His161-R                 | GATGCTGGAGGCAGCGACGTAGGTCTCGTG              | Construction of<br>D298A                                                                                       |
| Asp298-F                 | AGGGCAAGATCTTCGGCGAAGCCCTGGAGA              |                                                                                                                |
| Asp298-R                 | TCTCCAGGGCTTCGCCGAAGATCTTGCCCT              | Construction of<br>Y159A                                                                                       |
| Try159-F                 | CACGAGACCGCCGTCCATGCCTCCAGCATC              |                                                                                                                |
| Try159-R                 | GATGCTGGAGGCATGGACGGCGGTCTCGTG              | Construction of<br>pGEX-rhd1 $\alpha$                                                                          |
| Rhd1 $\alpha$ -Pr-F      | CCGGAATTCGGATGTACCCGAAGAATGCCTGGTA          |                                                                                                                |
| Rhd1 $\alpha$ -Pr-R      | CCCTCGAGGGCTAGGCGATCTGCCGGACC               | Construction of<br>pGEX-rhd1 $\beta$                                                                           |
| Rhd1 $\beta$ -Pr-F       | CGGAATTCAGTCATGCTCGATCTGATCGTCACC           |                                                                                                                |
| Rhd1 $\beta$ -Pr-R       | CCCTCGAGGGTCAGAGGTCCAGTACCAGGCGC            |                                                                                                                |

## References

1. Simon, R.; Priefer, U.; Pühler, A. A Broad Host Range Mobilization System for In Vivo Genetic Engineering: Transposon Mutagenesis in Gram Negative Bacteria. *Bio/Technology* **1983**, *1*, 784–791. <https://doi.org/10.1038/nbt1183-784>.
2. Hoang, T.T.; Karkhoff-Schweizer, R.R.; Kutchma, A.J.; Schweizer, H.P. A broad-host-range Flp-FRT recombination system for site-specific excision of chromosomally-located DNA sequences: application for isolation of unmarked *Pseudomonas aeruginosa* mutants. *Gene* **1998**, *212*, 77–86. [https://doi.org/10.1016/s0378-1119\(98\)00130-9](https://doi.org/10.1016/s0378-1119(98)00130-9).
3. Kovach, M.E.; Elzer, P.H.; Hill, D.S.; Robertson, G.T.; Farris, M.A.; Roop, R.M.; Peterson, K.M. Four new derivatives of the broad-host-range cloning vector pBBR1MCS, carrying different antibiotic-resistance cassettes. *Gene* **1995**, *166*, 175–176. [https://doi.org/10.1016/0378-1119\(95\)00584-1](https://doi.org/10.1016/0378-1119(95)00584-1).
